# Supplementary material for: Association between sublingual microcirculation, tissue perfusion and organ failure in major trauma: A subgroup analysis of a prospective observational study
Source: PubMed Central journal article supplement (PMC6400441; doi:10.1371/journal.pone.0213085), 2019-03-05
Supplement: pone.0213085.s002.pdf [file pone.0213085.s002.pdf]

**S1 Table: Baseline characteristics of the 39 trauma patients included in MicroDAIMON study; n (%).**

| <b>Mechanism of trauma, n(%)</b>                 |               | <b>n (%)</b> |
|--------------------------------------------------|---------------|--------------|
|                                                  | Traffic       | 20 (51.3%)   |
|                                                  | Fall          | 9 (23.1%)    |
|                                                  | Knife wound   | 3 (7.7%)     |
|                                                  | Other         | 7 (17.9%)    |
| <b>Injured area, n(%)</b>                        |               |              |
|                                                  | Head and neck | 19 (48,7%)   |
|                                                  | Face          | 8 (20,1%)    |
|                                                  | Chest         | 19 (48,7%)   |
|                                                  | Abdomen       | 15 (38,5%)   |
|                                                  | Extremity     | 12 (30,1%)   |
|                                                  | Other         | 7 (17,9%)    |
| <b>Crush Syndrome, n(%)</b>                      |               |              |
|                                                  |               | 5 (12.8%)    |
| <b>Patients transfused in the ER<sup>a</sup></b> |               |              |
|                                                  |               | 18<br>(46%)  |
| <b>Surgery after ER</b>                          |               |              |
|                                                  |               | 18<br>(46%)  |

<sup>a</sup>ER=Emergency Room
