# Supplementary material for: Association between sublingual microcirculation, tissue perfusion and organ failure in major trauma: A subgroup analysis of a prospective observational study
Source: PubMed Central journal article supplement (PMC6400441; doi:10.1371/journal.pone.0213085), 2019-03-05
Supplement: pone.0213085.s003.pdf [file pone.0213085.s003.pdf]

**S2 Table: Supporting information; anonymized datasheet with main data collected.**

| SOFA_admission | SOFA_D2 | SOFA_D3 | SOFA_D4 | PVD_D1 | TVD_D1 | PPV_D1 | DeBacker_D1 | MFI_D1 | StO2_D1 | Downslope_D1 | Upslope_D1 | AUC_D1 | PVD_D2 | TVD_D2 | PPV_D2 | DeBacker_D2 | MFI_D2 |
|----------------|---------|---------|---------|--------|--------|--------|-------------|--------|---------|--------------|------------|--------|--------|--------|--------|-------------|--------|
| 13             | 13      | 11      | 12      | 18,86  | 19,44  | 96,79  | 12,27       | 2,92   | 75      | -9,25        | 121,5      | 11,5   | 14,01  | 14,01  | 100    | 9,18        | 3      |
| 10             | 12      | 10      | 11      | 16,03  | 16,58  | 96,78  | 8,89        | 2,83   | 64      | -3,72        | 17,35      | 0      | 19,32  | 19,91  | 96,84  | 12,47       | 2,75   |
| 8              | 9       | 8       | 10      | 22,16  | 22,96  | 96,44  | 12,68       | 2,53   | 80      | -8,34        | 67,28      | 7,1    | 23,46  | 23,46  | 100    | 13,31       | 3      |
| 7              | 10      | 7       | 10      | 16,52  | 16,63  | 99,38  | 9,92        | 3      | 60      | -9,83        | 134,57     | 10,8   | 16,31  | 16,88  | 96,83  | 10,83       | 3      |
| 11             | 8       | 8       | 9       | 13,58  | 14,44  | 94,62  | 9,71        | 3      |         |              |            |        | 16     | 16,46  | 97,08  | 9,66        | 2,83   |
| 9              | 9       | 10      | 9       | 14,21  | 16,58  | 86,18  | 7,41        | 3      |         |              |            |        | 13,89  | 18,58  | 75,93  | 10,03       | 3      |
| 8              | 8       | 8       | 9       | 18,02  | 18,02  | 100    | 10,78       | 3      | 78      | -7,76        | 155,51     | 14,6   | 18,04  | 18,04  | 100    | 11,95       | 3      |
| 7              |         | 9       | 9       | 14,55  | 15,01  | 95,93  | 10,12       | 3      | 81      | -11,19       | 540        | 28,9   |        |        |        |             |        |
| 5              | 10      | 9       | 9       | 16,07  | 16,84  | 94,89  | 11,29       | 2,42   | 94      | -9,68        | 294,64     | 8,6    | 14,94  | 16,23  | 91,73  | 10,05       | 2,42   |
| 7              | 8       | 8       | 7       | 22,12  | 22,36  | 98,97  | 11,54       | 2,92   | 78      | -6,71        | 146,55     | 26,3   | 23,65  | 23,65  | 100    | 13,02       | 3      |
| 7              | 7       | 7       | 7       | 16,59  | 17,84  | 92,98  | 10,32       | 3      | 78      | -13,37       | 94,2       | 12,6   | 11,4   | 11,4   | 100    | 7,81        | 3      |
| 9              | 9       | 7       | 7       | 13,77  | 15,05  | 90,4   | 9,52        | 2,67   | 81      | -13,04       | 77,32      | 6,9    | 15,58  | 15,69  | 99,1   | 8,85        | 2,67   |
| 5              | 9       | 9       | 9       | 17,62  | 22,66  | 77,39  | 16,01       | 3      | 64      | -8,88        | 149,64     | 29,9   | 20,13  | 23,38  | 86,4   | 15,8        | 3      |
| 10             | 8       | 7       | 6       | 25,9   | 28,32  | 91,38  | 16,68       | 2,58   | 71      | -6,62        | 149,41     | 7,3    | 24,14  | 25,02  | 96,32  | 16          | 2,92   |
| 13             | 12      | 14      | 6       | 18,47  | 23,37  | 79,15  | 11,83       | 2,33   | 67      | -7,61        | 192,86     | 23,7   | 14,49  | 21,58  | 66,23  | 11,41       | 3      |
| 6              | 5       | 6       | 6       | 17,28  | 17,63  | 97,82  | 9,05        | 2,75   | 60      | -9,07        | 175        | 43,2   | 23,31  | 23,31  | 100    | 13,14       | 3      |
| 4              | 7       | 8       | 5       | 23,12  | 23,12  | 100    | 13,87       | 3      | 61      | -7,17        | 84         | 15,9   | 25,77  | 25,77  | 100    | 14,68       | 3      |
| 5              | 5       | 3       | 5       | 11,21  | 17,72  | 63,35  | 11,72       | 2,92   | 92      | -5,84        | 191,79     | 21,9   | 17,71  | 20,33  | 87,16  | 13,44       | 3      |
| 9              | 10      | 6       | 4       | 20,64  | 20,88  | 98,25  | 10,48       | 2,93   | 77,9    | -8,52        | 170        | 9      | 16,92  | 17,68  | 95,78  | 10,88       | 2,87   |
| 3              | 7       | 4       | 4       | 16,72  | 16,83  | 99,35  | 9,42        | 3      | 70      | -8,88        | 129,64     | 6,8    | 19,27  | 19,27  | 100    | 9,84        | 2,93   |
| 4              | 8       | 8       | 4       | 22,27  | 22,37  | 99,54  | 12,17       | 2,93   | 81      | -6,35        | 174,64     | 3,2    |        |        |        |             |        |
| 3              | 3       | 3       | 4       | 23,8   | 27,45  | 86,8   | 8,71        | 3      | 82      | -7,19        | 150,27     | 21,6   | 23,19  | 26,38  | 87,85  | 9,73        | 3      |
| 8              | 8       | 3       | 3       | 21,18  | 23,64  | 88,39  | 15,12       | 2,42   | 73,3    | -5,42        | 165,71     | 33,7   | 20,95  | 22,54  | 92,27  | 13,7        | 2,5    |
| 9              | 8       | 5       | 3       | 23,56  | 23,56  | 100    | 12,35       | 3      | 88      | -4,94        | 249        | 3      | 26,92  | 26,92  | 100    | 16,29       | 3      |
| 1              | 3       | 2       | 2       |        |        |        |             |        | 81,2    | -9,28        | 152,45     | 11,2   |        |        |        |             |        |
| 0              | 0       | 1       | 1       |        |        |        |             |        | 89,2    | -8,14        | 306,86     | 19     |        |        |        |             |        |
| 2              | 2       | 2       | 2       | 18,71  | 22,37  | 83,83  | 9,97        | 3      | 68      | -6,92        | 228        | 495    | 21,7   | 24,98  | 86,94  | 10,05       | 3      |
| 5              | 4       | 4       | 4       | 22,24  | 23,75  | 93,68  | 10,38       | 3      | 81      | -7,3         | 168,73     | 37,3   | 18,64  | 21,99  | 84,78  | 9,41        | 3      |

| StO2_D2 | Downslope_D2 | Upslope_D2 | AUC_D2 | PVD_D3 | TVD_D3 | PPV_D3 | DeBacker_D3 | MFI_D3 | StO2_D3 | Downslope_D3 | Upslope_D3 | AUC_D3 | PVD_D4 | TVD_D4 | PPV_D4 | DeBacker_D4 | MFI_D4 |
|---------|--------------|------------|--------|--------|--------|--------|-------------|--------|---------|--------------|------------|--------|--------|--------|--------|-------------|--------|
| 58      | -9,11        | 50,36      | 6,5    | 21,86  | 21,86  | 100    | 13,61       | 2,75   |         |              |            |        | 22,87  | 22,87  | 100    | 13,39       | 2,92   |
| 74      | -5,01        | 92,73      | 10,7   | 15,08  | 15,97  | 94,27  | 9,54        | 3      | 60      | -4,94        | 36,47      | 15,4   | 13,02  | 16,58  | 77,56  | 11,06       | 1,5    |
| 94      | -10          | 333,43     | 5,7    | 24,26  | 24,46  | 99,23  | 14,74       | 3      | 80      | -8,83        | 164        | 16,5   | 22,07  | 22,07  | 100    | 11,79       | 3      |
| 78      | -7,74        | 137,14     | 4,8    | 18,61  | 19,24  | 96,75  | 12,45       | 2,58   | 82      | -7,11        | 176,43     | 13,7   | 18,01  | 18,96  | 95,02  | 11,58       | 2,17   |
|         |              |            |        | 16,06  | 16,24  | 98,79  | 9,27        | 2,58   |         |              |            |        | 15,21  | 15,21  | 100    | 9,32        | 3      |
| 54      | -5,97        | 102        | 16,6   | 13,75  | 18,54  | 73,54  | 7,32        | 3      | 74      | -5,04        | 58,22      | 15,1   | 14,13  | 18,81  | 74,73  | 9,16        | 3      |
| 78      | -6,37        | 77,25      | 12,6   | 19,93  | 20,03  | 99,49  | 12,19       | 3      | 83      | -9,14        | 266,57     | 7,2    | 20,04  | 20,43  | 98,63  | 11,79       | 3      |
| 81      | -8,53        | 399        | 34,9   | 19,2   | 19,2   | 100    | 12,11       | 3      | 75      | -8,04        | 294        | 13,5   | 17,71  | 17,71  | 100    | 11,94       | 3      |
| 94      | -7,82        | 182,41     | 0      | 16,62  | 17,32  | 95,15  | 11,76       | 2,67   | 80      | -9,48        | 286,29     | 17,4   | 20,98  | 21,58  | 96,77  | 14,19       | 2,58   |
| 73      | -6,76        | 207        | 24,4   | 23,73  | 23,73  | 100    | 13,12       | 3      | 87      | -9,02        | 296,57     | 10,2   | 19,58  | 19,58  | 100    | 11,38       | 3      |
| 89,9    | -6           | 147,86     | 13,9   | 19,48  | 19,48  | 100    | 13,02       | 3      | 88,7    | -8,13        | 300        | 13,6   | 17,02  | 17,02  | 100    | 10,18       | 3      |
| 89,5    | -12,66       | 72,33      | 4,9    | 17,91  | 17,91  | 100    | 10,56       | 3      | 85      | -9,09        | 225        | 10,7   | 15,15  | 16,3   | 92,57  | 10,01       | 2,58   |
| 77,8    | -8,94        | 64,39      | 31     | 21,39  | 25,84  | 82,55  | 15,19       | 3      | 75      | -9,41        | 211,07     | 24,8   | 21,39  | 25,84  | 82,55  | 15,19       | 3      |
| 76,8    | -10,76       | 134        | 11,7   | 11,79  | 18,07  | 64,49  | 11,49       | 1,33   | 74,1    | -10,17       | 187,5      | 19,6   | 25,37  | 25,65  | 98,8   | 16,36       | 2,92   |
| 71,9    | -16,48       | 136,07     | 12,5   | 21,52  | 26,54  | 81,26  | 12,43       | 3      | 76      | -8,22        | 114,23     | 10,6   | 13,21  | 19,42  | 68,17  | 9,22        | 2      |
| 73      | -9,61        | 204,64     | 29,3   | 7,94   | 7,94   | 100    | 6,47        | 3      | 92      | -9,11        | 67,9       | 6,5    | 16,18  | 16,49  | 98,48  | 10,61       | 2,92   |
| 73      | -8,01        | 102,55     | 15,7   | 21,71  | 21,71  | 100    | 12,38       | 3      | 77      | -6,59        | 174,64     | 20,5   | 18,74  | 19,13  | 97,98  | 11,5        | 3      |
| 85      | -7,25        | 222,86     | 34,3   | 16,16  | 19,29  | 84,21  | 13,72       | 3      | 83      | -8,42        | 255,43     | 29,5   | 18,38  | 21,43  | 86,3   | 12,85       | 3      |
| 79,8    | -8,56        | 234        | 4      | 18,04  | 18,65  | 96,11  | 9,82        | 3      | 79,4    | -5,52        | 213,21     | 23,1   | 16,92  | 17,31  | 97,62  | 10,18       | 2,77   |
| 57,3    | -4,44        | 97,14      | 19     | 20,55  | 20,55  | 100    | 10,78       | 3      | 78,5    | -7,64        | 264        | 6,5    | 21,33  | 21,33  | 100    | 11,89       | 2,93   |
| 88,6    | -10,06       | 270        | 11,3   | 21,56  | 21,66  | 99,58  | 13,38       | 3      | 83      | -9,47        | 96,73      | 13,9   | 23,95  | 23,95  | 100    | 13,73       | 3      |
| 88      | -7,45        | 193        | 18,2   | 26,39  | 31,83  | 82,96  | 12,07       | 3      | 87      | -8,27        | 223,57     | 13,6   | 17,67  | 25,13  | 69,64  | 9,51        | 3      |

|         |           |         |        |         |               |           |           |       |        |        |            |      |        |       |       |            |       |
|---------|-----------|---------|--------|---------|---------------|-----------|-----------|-------|--------|--------|------------|------|--------|-------|-------|------------|-------|
| 96      | -10,21    | 300,86  | 3,5    | 21,08   | 21,74         | 96,96     | 14,13     | 2,75  | 87,7   | -6,43  | 273        | 1    | 18,26  | 20,4  | 89,4  | 11,71      | 2,58  |
| 69      | -8,05     | 228     | 14,3   | 19,44   | 19,44         | 100       | 11,42     | 3     | 86     | -6,16  | 78,21      | 17,6 | 21,32  | 21,32 | 100   | 13,76      | 3     |
| 77,9    | -9,57     | 249,43  | 27,3   | 15,72   | 16,05         | 97,22     | 10,86     | 2,83  | 77     | -7,43  | 177        | 32,3 | 16,02  | 16,31 | 97,96 | 12,09      | 3     |
| 72      | -6,25     | 214,29  | 11,8   | 19,63   | 19,63         | 100       | 11,92     | 3     | 76,3   | -12,66 | 297,03     | 7,2  | 19,63  | 19,63 | 100   | 11,92      | 3     |
| 66      | -4,85     | 95,45   | 42,3   | 18,88   | 23,45         | 80,78     | 11,54     | 3     | 76     | -9     | 184,64     | 27,6 | 18,88  | 23,45 | 80,78 | 11,54      | 3     |
| 87      | -7,53     | 155,64  | 20,8   | 18,63   | 24,39         | 76,57     | 8,38      | 3     | 94     | -9,63  | 315        | 11,7 | 18,63  | 24,39 | 76,57 | 8,38       | 3     |
| StO2_D4 | Downslope | Upslope | AUC_D4 | LOS_ICU | ICU_Mortality | APACHE_2a | NE_mcg/kg | HR_D1 | MAP_D1 | HB_D1  | Transfusio | Age  | MAP_D2 | HR_D2 | NE_D2 | Transfusio | Hb_D2 |
| 77,8    | -5,35     | 105     | 25,8   | 15      | 0             | 26        | 0,96      | 83    | 90     | 10,2   | 1          | 78   | 71     | 112   | 0,46  | 0          | 9,7   |
| 73      | -1,84     | 63,27   | 37,3   | 24      | 0             | 13        | 0,21      | 74    | 95     | 10,4   | 0          | 75   | 90     | 86    | 0,28  | 0          | 8,6   |
| 75      | -10,68    | 113,18  | 24,7   | 17      | 0             | 17        | 0,24      | 95    | 96     | 10,3   | 0          | 56   | 85     | 60    | 0,24  | 1          | 8,3   |
| 86      | -7,45     | 106,09  | 5,8    | 54      | 0             | 9         | 0         | 77    | 83     | 11,3   | 0          | 88   | 69     | 75    | 0     | 0          | 12,1  |
|         |           |         |        | 28      | 0             | 20        | 0,05      | 56    | 66     | 10,9   | 0          | 33   |        | 63    | 0,08  | 0          | 9,9   |
| 83      | -10,33    | 132,5   | 0      | 12      | 0             | 11        | 0,62      | 94    | 68     | 10,2   | 0          | 40   | 95     | 129   | 0,62  | 1          | 8,1   |
| 77      | -9,07     | 112,91  | 7,2    | 7       | 0             | 16        | 0,03      | 45    | 85     | 13,9   | 0          | 26   | 115    | 45    | 0,02  | 0          | 13    |
| 78      | -10,25    | 295,71  | 28,3   | 26      | 0             | 14        | 0,08      | 62    | 84     | 10,4   | 0          | 18   | 94     | 66    |       | 0          | 9,8   |
| 83      | -6,26     | 190,5   | 19,4   | 10      | 0             | 14        | 0         | 117   | 123    | 9,8    | 0          | 47   | 89     | 84    | 0,12  | 1          | 9,9   |
| 78      | -6,64     | 222     | 10,6   | 17      | 0             | 12        | 0,48      | 74    | 87     | 11,3   | 0          | 23   | 82     | 59    | 0,29  | 1          | 8,9   |
| 90      | -6,74     | 247,72  | 7,2    | 15      | 0             | 15        | 0,3       | 102   | 75     | 8,1    | 1          | 44   | 56     | 101   | 0     | 1          | 8,6   |
| 83      | -9,11     | 126,92  | 7,2    | 9       | 0             | 5         | 0,3       | 105   | 77     | 10,9   | 1          | 40   | 98     | 96    | 0,22  | 0          | 8,2   |
| 75      | -9,41     | 211,07  | 24,8   | 5       | 0             | 17        | 0,17      | 116   | 98     | 13,3   | 0          | 86   | 100    | 130   | 0,17  | 0          | 12,6  |
| 75,9    | -12,12    | 204,86  | 12,3   | 7       | 0             | 21        | 0,18      | 52    | 92     | 11,1   | 1          | 81   | 109    | 133   | 0,18  | 0          | 10,9  |
| 71,5    | -16,1     | 84,21   | 14,2   | 45      | 0             | 23        | 0,8       | 50    | 94     | 8,8    | 1          | 73   | 81     | 83    | 0,47  | 0          | 10    |
| 72      | -14,58    | 177     | 0      | 7       | 0             | 18        | 0         | 66    | 100    | 12,3   | 0          | 44   | 99     | 60    | 0     | 0          | 11,2  |
| 72      | -11,44    | 77,5    | 0,1    | 26      | 0             | 17        | 0         | 61    | 62     | 11,3   | 0          |      | 68     | 76    | 0,08  | 0          | 10,7  |
| 86      | -8,35     | 213,21  | 23,8   | 13      | 0             | 21        | 0         | 61    | 104    | 9,6    | 1          | 78   | 100    | 63    | 0     | 0          | 9,4   |
| 68,2    | -9,38     | 93,82   | 18,8   | 5       | 0             | 14        | 0,58      | 100   | 58     | 10,5   | 1          | 71   | 78     | 65    | 0,67  | 0          | 9     |
| 82      | -12,12    | 283     | 8,2    | 4       | 0             | 4         | 0         | 116   | 102    | 8,8    | 1          | 31   | 67     | 110   | 0     | 0          | 9,1   |
| 74,8    | -9,68     | 194,57  | 11,8   | 11      | 0             | 11        | 0         | 62    | 78     | 9,6    | 1          | 66   | 68     | 70    | 0     | 0          | 9,4   |
| 85      | -7,92     | 294,86  | 19,5   | 15      | 0             | 9         | 0         | 78    | 80     | 12,7   | 0          | 68   | 100    | 78    | 0     | 0          | 12,5  |
| 73      | -4,54     | 255     | 17,2   | 5       | 0             | 16        | 0,13      | 64    | 88     | 8,8    | 0          | 77   | 92     | 105   | 0,13  | 0          | 9,1   |
| 92      | -5,18     | 144     | 0,1    | 6       | 0             | 16        | 0,22      | 56    | 84     | 12,6   | 0          | 71   | 82     | 58    | 0,13  | 0          | 12,5  |
| 80      | -6,56     | 169     | 28     | 7       | 0             | 1         | 0         | 85    | 74     | 12,5   | 0          | 18   | 81     | 82    | 0     | 0          | 11,6  |
| 76,3    | -12,66    | 297,03  | 7,2    | 4       | 0             | 0         | 0         | 106   | 89     | 11,1   | 0          | 32   | 85     | 85    |       | 0          | 9,5   |
| 76      | -9        | 184,64  | 27,6   | 4       | 0             | 7         | 0         | 74    | 90     | 11,3   | 1          | 54   | 95     | 94    | 0     | 0          | 10,9  |
| 94      | -9,63     | 315     | 11,7   | 4       | 0             | 14        | 0         | 52    | 70     | 12,1   | 0          | 72   | 78     | 49    | 0     | 0          | 10,8  |

| MAP_D3 | HR_d3 | NE_D3 | Transfusio | Hb_D3 | MAP_D4 | HR_D4 | NE_D4 | Transfusio | Hb_D4 |
|--------|-------|-------|------------|-------|--------|-------|-------|------------|-------|
| 88     | 93    | 0,33  | 0          | 11,5  | 88     | 73    | 0,17  | 0          | 10,9  |
| 114    | 114   | 0,4   | 0          | 10,5  | 88     | 109   | 0,36  | 1          | 10    |
| 89     | 45    | 0,08  | 0          | 9,5   | 102    | 75    | 0,09  | 0          | 9,9   |
| 77     | 85    | 0     | 0          | 9,8   | 89     | 90    | 0,11  | 0          | 10,9  |
| 76     | 54    | 0,04  | 0          | 9     | 117    | 65    | 0,17  | 0          | 9,3   |
| 88     | 92    | 0,62  | 0          | 9,7   | 84     | 85    | 0,69  | 0          | 8,7   |
| 79     | 63    | 0,04  | 0          | 12,6  | 87     | 81    | 0,07  | 0          | 12    |
| 86     | 70    | 0,13  | 1          | 10,9  | 86     | 70    | 0,13  | 0          | 9,4   |

|     |     |      |   |      |     |     |      |   |      |
|-----|-----|------|---|------|-----|-----|------|---|------|
| 98  | 74  | 0,12 | 0 | 9,8  | 80  | 64  | 0,04 | 0 | 9,4  |
| 79  | 78  | 0,11 | 1 | 9,8  | 96  | 74  | 0,1  | 0 | 9,7  |
| 78  | 91  | 0    | 1 | 7,9  | 77  | 70  | 0    | 1 | 10,5 |
| 97  | 53  | 0,09 | 0 | 10,9 | 88  | 52  | 0,04 | 0 | 8,3  |
| 77  | 93  | 0,09 | 0 | 10,9 |     |     |      |   |      |
| 103 | 70  | 0    | 0 | 10,5 | 97  | 68  | 0    | 0 | 10,2 |
| 90  | 91  | 0,44 | 0 | 9,4  | 55  | 87  | 0,31 | 1 | 8,4  |
| 104 | 58  | 0    | 0 | 11,9 | 104 | 60  | 0    | 0 | 12,4 |
| 64  | 68  | 0,04 | 0 | 9,1  | 75  | 72  |      | 0 | 8,7  |
| 95  | 71  | 0    | 0 | 9    | 109 | 63  | 0    | 0 | 9    |
| 67  | 60  | 0    | 1 | 8,9  | 70  | 63  | 0    | 1 | 8,2  |
| 83  | 117 | 0    | 0 | 9,2  | 84  | 84  | 0    | 1 | 7,9  |
| 88  | 60  | 0,05 | 0 | 8,8  | 81  | 73  | 0    | 0 | 8,2  |
| 97  | 76  | 0    | 0 | 12,6 | 120 | 85  | 0    | 0 | 13,1 |
| 103 | 120 | 0    | 1 | 6,7  | 107 | 120 | 0    | 0 | 9,9  |
| 87  | 71  | 0    | 0 | 11,5 | 104 | 101 | 0    | 0 | 11,6 |
| 82  | 78  | 0    | 0 | 11,2 | 73  | 77  | 0    | 0 | 10,6 |
| 90  | 86  | 0    | 0 | 9,2  |     |     |      |   |      |
| 74  | 94  | 0    | 0 | 8,4  |     |     |      |   |      |
| 108 | 65  | 0    | 0 | 10,6 |     |     |      |   |      |

SOFA= Sequential Organ failure Score; PVDs= perfused small vessel density; TVDs= total small vessel density; PPV= percentage of perfused vessels; MFI= microvascular flow index; StO<sub>2</sub>= tissue oxygen saturation; AUC StO<sub>2</sub>= area under the curve of tissue oxygen saturation; LOS= Length of Stay; ICU= Intensive Care Unit; APACHE= Acute Physiology, Age, Chronic Health Evaluation; NE=Norepinephrine; HR= Heart Rate; MAP= Mean Arterial Pressure; Hb= Haemoglobin.
